# Supplementary material
Source: PubMed Central journal article supplement (PMC4306643)
Supplement: NIHMS638833-supplement-2.pdf [file NIHMS638833-supplement-2.pdf]

Table 1: IOL ARM

|                    | CPT codes          | Hospital              | Surgeon  | Anesthesia | Mean Cost | Number   | Total     | Subset Total | % of yearly total | CPI Adjusted Price |          |
|--------------------|--------------------|-----------------------|----------|------------|-----------|----------|-----------|--------------|-------------------|--------------------|----------|
| Year 2             | Office visits      | 92012 (x3) 92014 (x1) |          |            | \$736     | 228      | \$167,808 | \$170,958    | 69.7%             | \$193,497          |          |
|                    | Sensory Motor Exam | 92060 (x 74%)         |          |            | \$75      | 42       | \$3,150   |              |                   |                    |          |
|                    | patches            | 3 boxes at \$18 (x4)  |          |            | \$216     | 57       | \$12,312  | \$32,376     | 13.2%             | \$36,644           |          |
|                    | glasses            |                       |          |            | \$352     | 57       | \$20,064  |              |                   |                    |          |
|                    | contact lenses     |                       |          |            |           |          |           |              |                   |                    |          |
|                    | Membranectomy      | 66830                 | \$4,037  | \$420      | \$228     | \$4,685  | 1         | \$4,685      | \$41,864          | 17.1%              | \$47,383 |
|                    | Glaucoma Surgery   | 65850, 66625, 65865   | \$3,331  | \$632      | \$251     | \$4,214  | 1         | \$4,214      |                   |                    |          |
|                    | Secondary IOL      | 66985                 | \$15,292 | \$1,633    | \$1,244   | \$18,169 | 0         | \$0          |                   |                    |          |
| strabismus surgery | 67312              | \$5,932               | \$433    | \$228      | \$6,593   | 5        | \$32,965  |              |                   |                    |          |
|                    |                    |                       |          |            |           |          | \$245,198 |              |                   | \$277,525          |          |
| Year 3             | visits             | 92012 (x3) 92014 (x1) |          |            | \$736     | 228      | \$167,808 | \$170,958    | 60.19%            | \$188,850          |          |
|                    | strabismus         | 92060 (x 74%)         |          |            | \$75      | 42       | \$3,150   |              |                   |                    |          |
|                    | patches            | 3 boxes at \$18 (x4)  |          |            | \$216     | 57       | \$12,312  | \$32,205     | 11.34%            | \$35,576           |          |
|                    | glasses            |                       |          |            | \$349     | 57       | \$19,893  |              |                   |                    |          |
|                    | contact lenses     |                       |          |            |           |          |           |              |                   |                    |          |
|                    | Membranectomy      | 66830                 | \$4,037  | \$420      | \$228     | \$4,685  | 6         | \$28,110     | \$80,854          | 28.47%             | \$89,316 |
|                    | strabismus surgery | 67312                 | \$5,932  | \$433      | \$228     | \$6,593  | 8         | \$52,744     |                   |                    |          |
|                    |                    |                       |          |            |           |          | \$284,017 |              |                   | \$313,742          |          |
| Year 4             | visits             | 92012 (x3) 92014 (x1) |          |            | \$736     | 228      | \$167,808 | \$170,958    | 58.8%             | \$182,175          |          |
|                    | strabismus         | 92060 (x 74%)         |          |            | \$75      | 42       | \$3,150   |              |                   |                    |          |
|                    | patches            | 3 boxes at \$18 (x4)  |          |            | \$216     | 57       | \$12,312  | \$39,558     | 13.6%             | \$42,154           |          |
|                    | glasses            |                       |          |            | \$478     | 57       | \$27,246  |              |                   |                    |          |
|                    | contact lenses     |                       |          |            |           |          |           |              |                   |                    |          |
|                    | Membranectomy      | 66830                 | \$4,037  | \$420      | \$228     | \$4,685  | 2         | \$9,370      | \$80,196          | 27.6%              | \$85,458 |
|                    | Glaucoma Surgery   | 65850, 66625, 65865   | \$3,331  | \$632      | \$251     | \$4,214  | 1         | \$4,214      |                   |                    |          |
|                    | IOL Exchange       | 66986                 | \$14,159 | \$1,512    | \$1,152   | \$16,823 | 2         | \$33,647     |                   |                    |          |
| Secondary IOL      | 66985              | \$15,292              | \$1,633  | \$1,244    | \$18,169  | 0        | \$0       |              |                   |                    |          |
| strabismus surgery | 67312              | \$5,932               | \$433    | \$228      | \$6,593   | 5        | \$32,965  |              |                   |                    |          |
|                    |                    |                       |          |            |           |          | \$290,712 |              |                   | \$309,786          |          |
| Year 5             | visits             | 92014 (x3)            |          |            | \$723     | 171      | \$123,633 | \$126,783    | 68.2%             | \$131,111          |          |
|                    | strabismus         | 92060 (x 74%)         |          |            | \$75      | 42       | \$3,150   |              |                   |                    |          |
|                    | patches            | 4 boxes at \$18 (x3)  |          |            | \$216     | 57       | \$12,312  | \$41,154     | 24.5%             | \$42,559           |          |
|                    | glasses            |                       |          |            | \$506     | 57       | \$28,842  |              |                   |                    |          |
|                    | contact lenses     |                       |          |            |           |          |           |              |                   |                    |          |
|                    | Membranectomy      | 66830                 | \$4,037  | \$420      | \$228     | \$4,685  | 1         | \$4,685      | \$17,871          | 10.6%              | \$18,481 |
|                    | Secondary IOL      | 66985                 | \$15,292 | \$1,633    | \$1,244   | \$18,169 | 0         | \$0          |                   |                    |          |
| strabismus surgery | 67312              | \$5,932               | \$433    | \$228      | \$6,593   | 2        | \$13,186  |              |                   |                    |          |
|                    |                    |                       |          |            |           |          | \$185,808 |              |                   | \$192,151          |          |

**TOTAL IOL \$1,093,204**
