# Supplementary material
Source: PubMed Central journal article supplement (PMC4306643)
Supplement: NIHMS638833-supplement-3.pdf [file NIHMS638833-supplement-3.pdf]

Table 2: CL ARM

|                    | CPT codes          | Hospital              | Surgeon | Anesthesia | Mean Cost | Number   | Total     | Subset Total | % of yearly total | CPI Adjusted Price |
|--------------------|--------------------|-----------------------|---------|------------|-----------|----------|-----------|--------------|-------------------|--------------------|
| Year 2             | Office visits      | 92012 (x3) 92014 (x1) |         |            | \$736     | 228      | \$167,808 | \$171,483    | 54.9%             | \$194,091          |
|                    | Sensory Motor Exam | 92060 ( x 74%)        |         |            | \$75      | 49       | \$3,675   |              |                   |                    |
|                    | supplies           | 3 boxes at \$18 (x4)  |         |            | \$216     | 57       | \$12,312  | \$83,093     | 26.6%             | \$94,048           |
|                    | glasses            |                       |         |            | \$221     | 57       | \$12,597  |              |                   |                    |
|                    | contact lenses     |                       |         |            | \$1,039   | 56       | \$58,184  |              |                   |                    |
|                    | Membranectomy      | 66830                 |         |            |           | 0        | \$0       | \$57,727     | 18.5%             | \$65,338           |
|                    | Glaucoma Surgery   | 65850, 66625, 65865   |         |            |           | 0        | \$0       |              |                   |                    |
|                    | Secondary IOL      | 66985                 |         |            | \$18,169  | 1        | \$18,169  |              |                   |                    |
| strabismus surgery | 67312              | \$5,932               | \$433   | \$228      | \$6,593   | 6        | \$39,558  |              |                   |                    |
|                    |                    |                       |         |            |           |          | \$312,303 |              | \$353,477         |                    |
| Year 3             | visits             | 92012 (x3) 92014 (x1) |         |            | \$736     | 228      | \$167,808 | \$171,483    | 53.8%             | \$189,430          |
|                    | strabismus         | 92060 (x 74%)         |         |            | \$75      | 49       | \$3,675   |              |                   |                    |
|                    | supplies           | 3 boxes at \$18 (x4)  |         |            | \$216     | 57       | \$12,312  | \$100,370    | 31.5%             | \$110,875          |
|                    | glasses            |                       |         |            | \$362     | 57       | \$20,634  |              |                   |                    |
|                    | contact lenses     |                       |         |            | \$1,204   | 56       | \$67,424  |              |                   |                    |
|                    | Membranectomy      | 66830                 |         |            | \$4,685   | 3        | \$14,055  | \$47,020     | 14.7%             | \$51,941           |
|                    | strabismus surgery | 67312                 | \$5,932 | \$433      | \$228     | \$6,593  | 5         |              |                   |                    |
|                    |                    |                       |         |            |           |          | \$318,873 |              | \$352,246         |                    |
| Year 4             | visits             | 92012 (x3) 92014 (x1) |         |            | \$736     | 228      | \$167,808 | \$171,483    | 60.5%             | \$182,734          |
|                    | strabismus         | 92060 (x 74%)         |         |            | \$75      | 49       | \$3,675   |              |                   |                    |
|                    | supplies - patches | 3 boxes at \$18 (x4)  |         |            | \$216     | 57       | \$12,312  | \$76,385     | 26.9%             | \$81,397           |
|                    | glasses - actual   |                       |         |            | \$439     | 57       | \$25,023  |              |                   |                    |
|                    | contact lenses     |                       |         |            | \$710     | 55       | \$39,050  |              |                   |                    |
|                    | Membranectomy      | 66830                 |         |            |           | 0        | \$0       | \$35,569     | 12.5%             | \$37,903           |
|                    | Glaucoma Surgery   | 65850, 66625, 65865   |         |            | \$4,214   | 1        | \$4,214   |              |                   |                    |
|                    | IOL Exchange       | 66986                 |         |            |           | 0        | \$0       |              |                   |                    |
| Secondary IOL      | 66985              |                       |         | \$18,169   | 1         | \$18,169 |           |              |                   |                    |
| strabismus surgery | 67312              | \$5,932               | \$433   | \$228      | \$6,593   | 2        | \$13,186  |              |                   |                    |
|                    |                    |                       |         |            |           |          | \$283,437 |              | \$302,034         |                    |
| Year 5             | visits             | 92014 (x3)            |         |            | \$723     | 171      | \$123,633 | \$127,308    | 53.8%             | \$131,654          |
|                    | strabismus         | 92060 (x 74%)         |         |            | \$75      | 49       | \$3,675   |              |                   |                    |
|                    | supplies - patches | 4 boxes at \$18 (x3)  |         |            | \$216     | 57       | \$12,312  | \$71,571     | 30.2%             | \$74,014           |
|                    | glasses - actual   |                       |         |            | \$367     | 57       | \$20,919  |              |                   |                    |
|                    | contact lenses     |                       |         |            | \$710     | 54       | \$38,340  |              |                   |                    |
|                    | Membranectomy      | 66830                 |         |            |           | 0        | \$0       | \$37,948     | 16.0%             | \$39,244           |
|                    | Secondary IOL      | 66985                 |         |            | \$18,169  | 1        | \$18,169  |              |                   |                    |
| strabismus surgery | 67312              | \$5,932               | \$433   | \$228      | \$6,593   | 3        | \$19,779  |              |                   |                    |
|                    |                    |                       |         |            |           |          | \$236,827 |              | \$244,912         |                    |

**TOTAL CL      \$1,252,669**
