# Supplementary material
Source: PubMed Central journal article supplement (PMC4306643)
Supplement: NIHMS638833-supplement-4.pdf [file NIHMS638833-supplement-4.pdf]

Table 6: Number of Patients with Additional Intraocular Surgical Procedures  
By Treatment Group and Time Period

| Type of Surgical Procedure*    | Treatment<br>CL<br>(57 Patients) |                          |
|--------------------------------|----------------------------------|--------------------------|
|                                | During First Post-op Year        | After First Post-op Year |
| Clearing Visual Axis Opacities | 6                                | 3                        |
| Glaucoma Surgery               | 1                                | 1                        |
| Repair Retinal Detachment      | 2                                | 0                        |
| Repair Wound Dehiscence        | 0                                | 0                        |
| IOL Exchange                   | -                                | -                        |
| Iridectomy / Iridotomy         | 1                                | 0                        |
| Lysis of Vitreous Wick         | 0                                | 0                        |
| Secondary IOL                  | 0                                | 3                        |
| At Least 1 Surgical Procedure  | 7                                | 7                        |

\* Multiple surgical procedures could have been done during the same episode. Exam under anesthesia only or strabismus surgery only are not included.

† 1 CL patient and 3 IOL patients had surgery to clear the visual axis in both time periods.

‡ 1 IOL patient had glaucoma surgery in both time periods.

§ 2 CL patients and 3 IOL patients had at least 1 surgical procedure in both time periods.

IOL

(57 Patients)

| Total     | During First Post-op Year | After First Post-op Year | Total     |
|-----------|---------------------------|--------------------------|-----------|
| 8† (14%)  | 34                        | 8                        | 39† (68%) |
| 2 (4%)    | 4                         | 2                        | 5‡ (9%)   |
| 2 (4%)    | 0                         | 0                        | 0 (0%)    |
| 0 (0%)    | 1                         | 0                        | 1 (2%)    |
| -         | 1                         | 2                        | 3 (5%)    |
| 1 (2%)    | 1                         | 0                        | 1 (2%)    |
| 0 (0%)    | 1                         | 0                        | 1 (2%)    |
| 3 (5%)    | -                         | -                        | -         |
| 12§ (21%) | 36                        | 8                        | 41§ (72%) |
